# Supplementary material for: Biomass-derived three-dimensional porous N-doped carbonaceous aerogel for efficient supercapacitor electrodes
Source: Royal Society of Chemistry journal article supplement (doi:10.1039/c4ra02109f), 2014-01-01
Supplement: c4ra02109f1.pdf [file c4ra02109f1.pdf]

## Biomass-derived Three-dimensional Porous N-doped Carbonaceous Aerogel for Efficient Supercapacitor Electrodes

Yumei Ren<sup>a</sup>, Jianmin Zhang<sup>a</sup>, Qun Xu<sup>a\*</sup>, Zhimin Chen<sup>a</sup>, Daoyuan Yang<sup>a</sup>, Bo Wang<sup>a</sup>, Zheng Jiang<sup>a,b\*</sup>

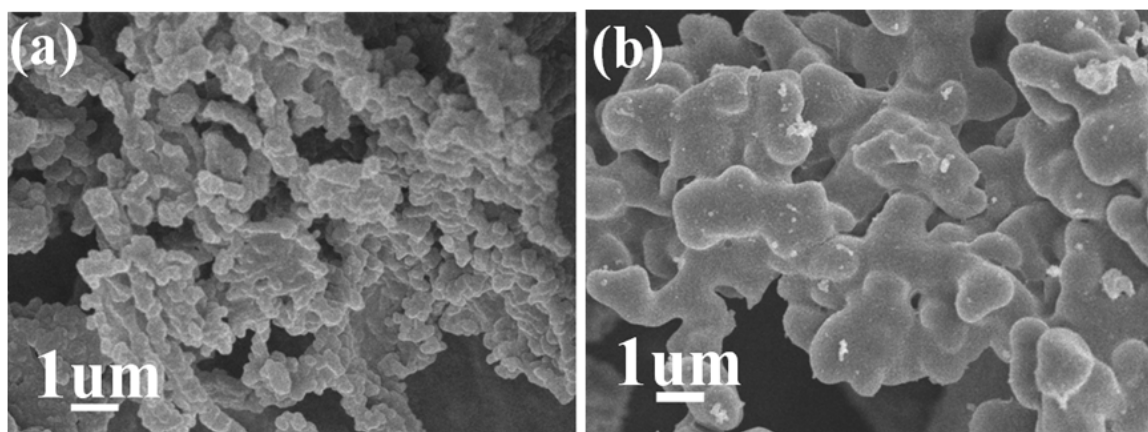

Figure S1. SEM images of N-CA-800 (d) and N-CA-1000.

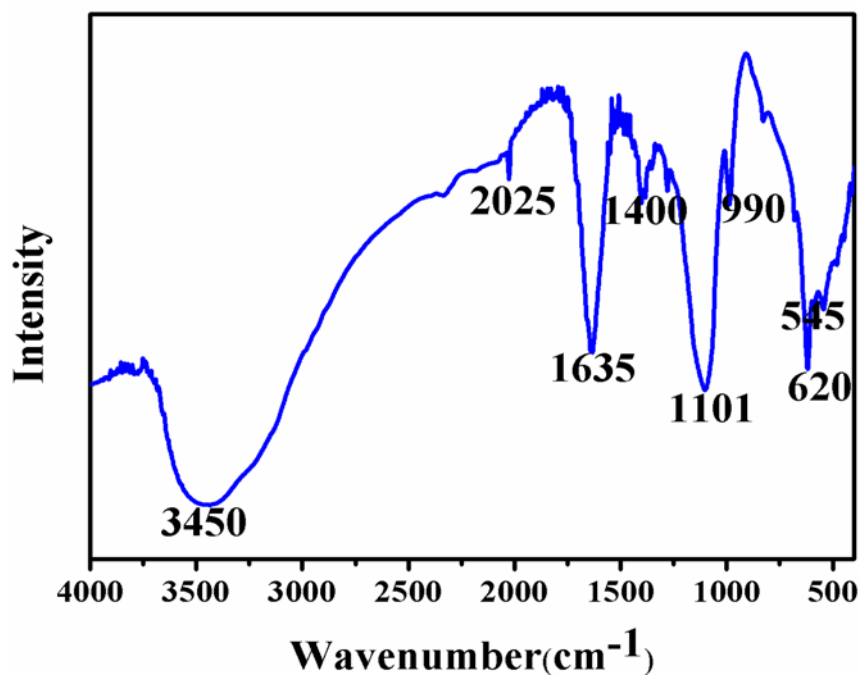

Figure S2. FTIR of carbonaceous aerogel.

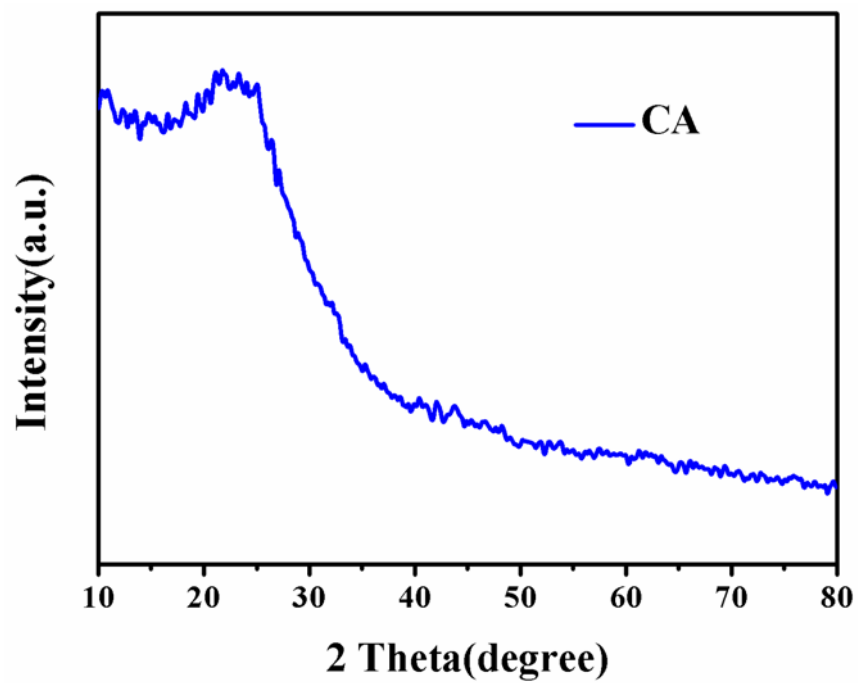

Figure S3. XRD of carbonaceous aerogel.
